# Supplementary material for: Relationship between pregnancy rate and serum progesterone concentration in cases of porcine embryo transfer
Source: PubMed Central journal article supplement — J Vet Sci. 2014 Mar 19;15(1):167–71. doi: 10.4142/jvs.2014.15.1.167 (PMC3973761; doi:10.4142/jvs.2014.15.1.167), 2014-03-19
Supplement: jvs-15-167-s001.pdf [file jvs-15-167-s001.pdf]

**Supplementary Table 1.** Identification (ID), breed, parity, P4 concentration, numbers of CLs, and ovulation status of the three groups of surrogates: (A) term-delivered, (B) aborted, and (C) implantation failure

**A**

| Number | ID      | Breed     | Parity | P4   | CL | Status         |
|--------|---------|-----------|--------|------|----|----------------|
| 1      | 321     | Yorkshire | 4      | 2.51 | –  | Post-ovulation |
| 2      | 207     | Yorkshire | 4      | 1.33 | 7  | Post-ovulation |
| 3      | 329     | Yorkshire | 3      | 1.42 | 8  | Ovulation      |
| 4      | F34-5   | Yorkshire | 1      | 0.93 | 5  | Post-ovulation |
| 5      | X27-3   | Yorkshire | 1      | 0.69 | –  | Pre-ovulation  |
| 6      | Y29-3   | Yorkshire | 1      | 0.57 | –  | Pre-ovulation  |
| 7      | R&F 25  | Yorkshire | 1      | 0.54 | –  | Post-ovulation |
| 8      | R&F 72  | Yorkshire | 1      | 1.23 | 8  | Post-ovulation |
| 9      | R&F 147 | Yorkshire | 1      | 3.98 | 7  | Post-ovulation |
| 10     | R&F 779 | Yorkshire | 1      | 1.88 | 7  | Post-ovulation |
| 11     | R&F 155 | Yorkshire | 2      | 6.86 | 8  | Post-ovulation |

**B**

| Number | ID        | Breed     | Parity | P4   | CL | Status         |
|--------|-----------|-----------|--------|------|----|----------------|
| 1      | 308       | Yorkshire | 4      | 1.59 | –  | Post-ovulation |
| 2      | 22-163    | Yorkshire | 4      | 2.67 | 5  | Post-ovulation |
| 3      | 471       | Yorkshire | 2      | 1.40 | 2  | Post-ovulation |
| 4      | Y29-1     | Yorkshire | 1      | 0.24 | 6  | Pre-Ovulation  |
| 5      | R&F 15    | Yorkshire | 1      | 6.98 | –  | Post-ovulation |
| 6      | R&F 1007  | Yorkshire | 1      | 4.68 | 7  | Pre-ovulation  |
| 7      | R&F F100  | Yorkshire | 1      | 5.93 | 4  | Post-ovulation |
| 8      | R&F F1055 | Yorkshire | 1      | 1.51 | 5  | Post-ovulation |
| 9      | R&F F1073 | Yorkshire | 1      | 0.78 | 3  | Ovulation      |
| 10     | R&F 165   | Yorkshire | 1      | 4.21 | 6  | Post-ovulation |
| 11     | R&F 197   | Yorkshire | 1      | 7.21 | 6  | Post-ovulation |
| 12     | R&F 560   | Yorkshire | 1      | 9.52 | 8  | Post-ovulation |
| 13     | R&F 266   | Yorkshire | 1      | 5.89 | 6  | Post-ovulation |
| 14     | R&F 279   | Yorkshire | 1      | 0.94 | 4  | Post-ovulation |
| 15     | R&F 620   | Yorkshire | 1      | 2.12 | 8  | Post-ovulation |
| 16     | R&F 1064  | Yorkshire | 2      | 5.87 | –  | Post-ovulation |
| 17     | R&F 252   | Yorkshire | 2      | 7.16 | 7  | Post-ovulation |

**Supplementary Table 1. Contributed**

**C**

| Number | ID        | Breed     | Parity | P4    | CL | Status         |
|--------|-----------|-----------|--------|-------|----|----------------|
| 1      | R&F 23    | Yorkshire | 1      | 0.38  | 5  | Pre-ovulation  |
| 2      | R&F F65   | Yorkshire | 1      | 0.48  | 9  | Post-ovulation |
| 3      | R&F 26    | Yorkshire | 1      | 2.42  | 7  | Post-ovulation |
| 4      | R&F 57    | Yorkshire | 1      | 1.91  | 6  | Post-ovulation |
| 5      | R&F F1003 | Yorkshire | 1      | 0.22  | 8  | Pre-ovulation  |
| 6      | R&F F1010 | Yorkshire | 1      | 18.16 | 5  | Pre-ovulation  |
| 7      | R&F F1011 | Yorkshire | 1      | 7.57  | 4  | Post-ovulation |
| 8      | R&F F1021 | Yorkshire | 1      | 0.70  | 8  | Post-ovulation |
| 9      | R&F F1022 | Yorkshire | 1      | 4.02  | 7  | Post-ovulation |
| 10     | R&F F1054 | Yorkshire | 1      | 6.94  | 5  | Post-ovulation |
| 11     | R&F F1071 | Yorkshire | 1      | 4.90  | 5  | Post-ovulation |
| 12     | R&F 68    | Yorkshire | 1      | 5.78  | 9  | Post-ovulation |
| 13     | R&F 110   | Yorkshire | 1      | 5.72  | 5  | Post-ovulation |
| 14     | R&F 173   | Yorkshire | 1      | 16.45 | 6  | Post-ovulation |
| 15     | R&F 293   | Yorkshire | 1      | 6.86  | 3  | Post-ovulation |
| 16     | R&F 1035  | Yorkshire | 1      | 0.71  | 7  | Post-ovulation |
| 17     | R&F 477   | Yorkshire | 1      | 3.28  | 6  | Post-ovulation |
| 18     | R&F 167   | Yorkshire | 1      | 1.72  | 7  | Post-ovulation |
| 19     | R&F 713   | Yorkshire | 1      | 2.88  | 7  | Post-ovulation |
| 20     | R&F 484   | Yorkshire | 1      | 4.52  | 5  | Post-ovulation |
| 21     | R&F 500   | Yorkshire | 1      | 6.69  | 7  | Post-ovulation |
| 22     | R&F 280   | Yorkshire | 1      | 3.63  | 5  | Post-ovulation |
| 23     | R&F 463   | Yorkshire | 1      | 4.00  | 5  | Post-ovulation |
| 24     | R&F 608   | Yorkshire | 1      | 16.42 | 9  | Post-ovulation |
| 25     | R&F 456   | Yorkshire | 1      | 2.79  | 8  | Post-ovulation |
| 26     | R&F 479   | Yorkshire | 1      | 5.14  | 6  | Post-ovulation |
| 27     | R&F F576  | Yorkshire | 1      | 2.35  | 8  | Post-ovulation |
| 28     | R&F F457  | Yorkshire | 1      | 1.40  | 12 | Post-ovulation |
| 29     | R&F F482  | Yorkshire | 1      | 0.21  | 9  | Pre-ovulation  |
| 30     | R&F 680   | Yorkshire | 1      | 5.66  | 9  | Post-ovulation |
| 31     | R&F 594   | Yorkshire | 1      | 1.29  | 6  | Post-ovulation |
| 32     | R&F 691   | Yorkshire | 1      | 11.66 | 9  | Post-ovulation |
| 33     | R&F 683   | Yorkshire | 1      | 12.96 | 14 | Post-ovulation |
| 34     | R&F 71    | Yorkshire | 1      | 7.74  | 13 | Post-ovulation |
| 35     | R&F 679   | Yorkshire | 1      | 16.55 | 9  | Post-ovulation |
| 36     | R&F 694   | Yorkshire | 1      | 2.92  | 10 | Post-ovulation |
| 37     | R&F 1041  | Yorkshire | 1      | 4.73  | 7  | Post-ovulation |
| 38     | R&F 707   | Yorkshire | 1      | 5.26  | 11 | Post-ovulation |
| 39     | R&F 672   | Yorkshire | 1      | 2.97  | 7  | Post-ovulation |
| 40     | R&F 602   | Yorkshire | 1      | 7.24  | 10 | Pre-ovulation  |
| 41     | R&F 605   | Yorkshire | 1      | 2.71  | 7  | Post-ovulation |
| 42     | R&F 658   | Yorkshire | 1      | 7.77  | 6  | Post-ovulation |
| 43     | R&F 733   | Yorkshire | 1      | 4.80  | 6  | Post-ovulation |
| 44     | R&F 788   | Yorkshire | 1      | 4.20  | 6  | Post-ovulation |
| 45     | R&F 766   | Yorkshire | 1      | 4.03  | 10 | Post-ovulation |
| 46     | R&F 776   | Yorkshire | 1      | 11.94 | 5  | Post-ovulation |
| 47     | R&F 111   | Yorkshire | 2      | 6.16  | 6  | Post-ovulation |
| 48     | R&F 287   | Yorkshire | 2      | 5.73  | 9  | Post-ovulation |

Supplementary Table 1. Contributed

C

| Number | ID      | Breed     | Parity | P4    | CL | Status         |
|--------|---------|-----------|--------|-------|----|----------------|
| 49     | R&F 137 | Yorkshire | 2      | 0.82  | 6  | Post-ovulation |
| 50     | R&F 296 | Yorkshire | 2      | 9.64  | 6  | Post-ovulation |
| 51     | R&F 303 | Yorkshire | 2      | 12.68 | 6  | Post-ovulation |
| 52     | R&F 154 | Yorkshire | 2      | 2.45  | 8  | Post-ovulation |
| 53     | R&F 618 | Yorkshire | 1      | 1.65  | 6  | Post-ovulation |
| 54     | R&F 593 | Yorkshire | 1      | 2.21  | 5  | Post-ovulation |
| 55     | R&F 481 | Yorkshire | 2      | 6.64  | 9  | Post-ovulation |
| 56     | R&F 495 | Yorkshire | 2      | 1.73  | 5  | Post-ovulation |
| 57     | R&F 493 | Yorkshire | 2      | 4.88  | 9  | Post-ovulation |
| 58     | R&F 34  | Yorkshire | 1      | 1.97  | 6  | Post-ovulation |
| 59     | F6-2    | Yorkshire | 1      | 5.80  | 8  | Post-ovulation |
| 60     | Y30-1   | Yorkshire | 1      | 1.98  | 6  | Post-ovulation |
| 61     | Y42-3   | Yorkshire | 1      | 0.26  | 5  | Pre-ovulation  |
| 62     | Y20-1   | Yorkshire | 1      | 4.51  | 6  | Post-ovulation |
| 63     | F39-2   | Yorkshire | 1      | 0.25  | 11 | Pre-ovulation  |
| 64     | Y11-7   | Yorkshire | 1      | 17.93 | -  | Post-ovulation |
| 65     | Y62-1   | Yorkshire | 1      | 0.16  | 10 | Pre-ovulation  |
| 66     | Y29-5   | Yorkshire | 1      | 0.33  | 5  | Pre-ovulation  |
| 67     | D39-5   | Duroc     | 1      | 1.68  | -  | Pre-ovulation  |
| 68     | D11-3   | Duroc     | 1      | 7.16  | 3  | Post-ovulation |
| 69     | Y02-4   | Yorkshire | 1      | 0.44  | -  | Pre-ovulation  |
| 70     | L35-1   | Landrace  | 1      | 9.49  | 4  | Post-ovulation |
| 71     | D36-2   | Duroc     | 1      | 4.43  | 9  | Post-ovulation |
| 72     | D39-4   | Duroc     | 1      | 6.55  | 6  | Post-ovulation |
| 73     | L35-4   | Landrace  | 1      | 0.25  | 6  | Post-ovulation |
| 74     | D37-7   | Duroc     | 2      | 1.43  | -  | Pre-ovulation  |
| 75     | Y21-4   | Yorkshire | 1      | 0.61  | 5  | Post-ovulation |
| 76     | F27-4   | Yorkshire | 1      | 2.37  | 6  | Post-ovulation |
| 77     | D39-3   | Duroc     | 1      | 10.46 | -  | Pre-ovulation  |
| 78     | Y54-3   | Yorkshire | 1      | 3.37  | 6  | Post-ovulation |
| 79     | D53-1   | Duroc     | 1      | 2.70  | 5  | Post-ovulation |
| 80     | Y50-6   | Yorkshire | 1      | 2.21  | 7  | Post-ovulation |
| 81     | Y50-1   | Yorkshire | 1      | 1.21  | 6  | Post-ovulation |
| 82     | Y52-1   | Yorkshire | 1      | 9.75  | 7  | Post-ovulation |
| 83     | 252     | Yorkshire | 4      | 4.74  | -  | Pre-ovulation  |
| 84     | 377     | Yorkshire | 2      | 9.68  | -  | Post-ovulation |
| 85     | 325     | Yorkshire | 3      | 6.78  | -  | Ovulation      |
| 86     | 417     | Yorkshire | 1      | 6.28  | -  | Post-ovulation |
| 87     | 428     | Yorkshire | 2      | 1.98  | -  | Pre-ovulation  |
| 88     | 446     | Yorkshire | 2      | 3.05  | 6  | -              |
| 89     | 164     | Yorkshire | 4      | 2.69  | 5  | -              |
| 90     | 440     | Yorkshire | 2      | 2.32  | 8  | -              |
| 91     | 362     | Yorkshire | 2      | 5.90  | 8  | Post-ovulation |
| 92     | 181     | Yorkshire | 2      | 2.47  | -  | Pre-ovulation  |
| 93     | 151     | Yorkshire | 4      | 0.80  | -  | Pre-ovulation  |
| 94     | 340     | Yorkshire | 3      | 5.86  | 7  | Post-ovulation |
| 95     | 365     | Yorkshire | 2      | 1.21  | 8  | Ovulation      |
| 96     | 50      | Yorkshire | 2      | 1.84  | 8  | Ovulation      |
| 97     | 348     | Yorkshire | 3      | 1.95  | 6  | Post-ovulation |
| 98     | 486     | Yorkshire | 1      | 1.30  | 9  | Post-ovulation |
